# Supplementary material for: NKX6.3 controls gastric differentiation and tumorigenesis
Source: PubMed Central journal article supplement (PMC4695069; doi:10.18632/oncotarget.4952), 2015-07-22
Supplement: oncotarget-06-28425-s001.pdf [file oncotarget-06-28425-s001.pdf]

## NKX6.3 controls gastric differentiation and tumorigenesis

### Supplementary Material

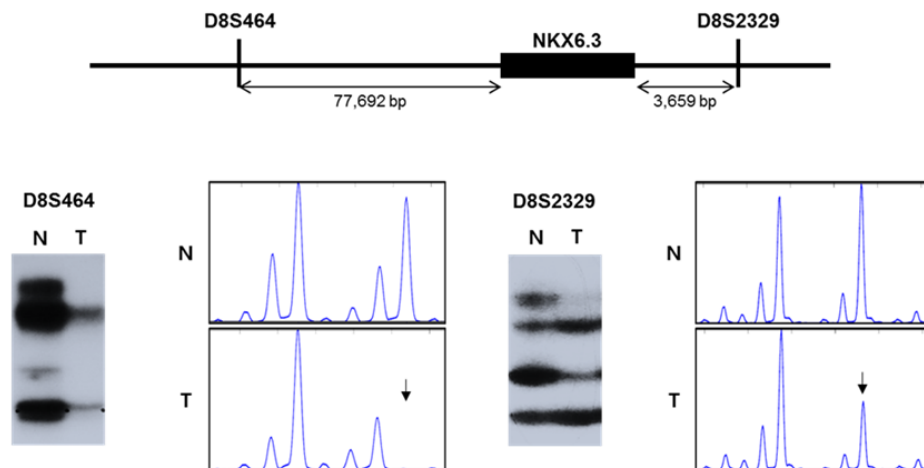

**Supplementary Figure 1.** Allelic loss of NKX6.3 gene in gastric cancer.

Allelic loss of NKX6.3 gene in gastric cancer with microsatellite markers D8S464 and D8S2329, which are located -77.692 kb and +3.659 kb from the *NKX6.3* locus, respectively. Representative autoradiograph and fluorescent microsatellite analysis showed loss of heterozygosity (LOH) at the *NKX6.3* locus.

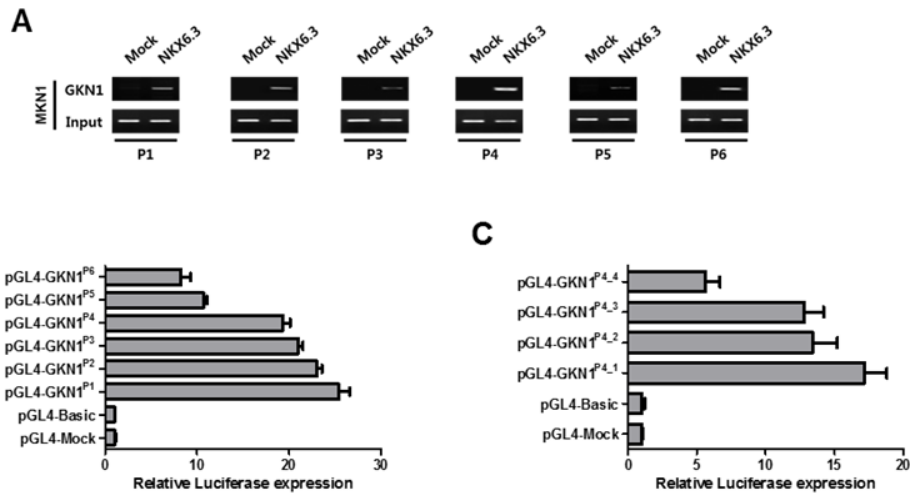

**Supplementary Figure 2. Binding activity of NKX6.3 to the GKN1 promoter.**

**A.** Putative promoter activity was characterized between -5 kb and +1 kb relative to transcription start site (TSS) of GKN1 by ChIP and QPCR.

**B.** Reporter gene luciferase assays showed that NKX6.3 occupancy was 18-fold enriched at the P4 region compared to control. Normalized luciferase activity values for each construct (N=3) are represented as mean  $\pm$  SD.

**C.** Activity analysis of 5'-deletion constructs at the P4 promoter region demonstrated a significant decrease in promoter activity. Further deletion of the 5' binding motifs resulted in a progressive loss of activity, indicating that NKX6.3 binding motifs at P4 construct are required for the GKN1 transcription in MKN1 cells.

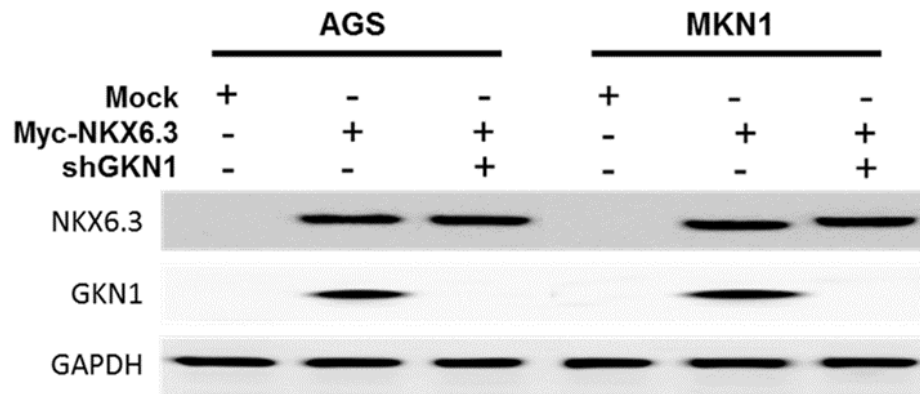

**Supplementary Figure 3. GKN1 silencing by shRNA in NKX6.3 stable cells.**

NKX6.3 induced the GKN1 expression, whereas GKN1 silencing with *shGKN1* completely ablated NKX6.3-induced GKN1 expression.

**Supplementary Table 1.** The primer sequences used for studies of the *NKX6.3* binding activity on *GKN1* promoter region

| Primer name      | Sequences                                                                                               |
|------------------|---------------------------------------------------------------------------------------------------------|
| ChIP-PCR         |                                                                                                         |
| P1               | F: 5'- GTACCTGAGCATTGTTTGTTTTACATCTT -3'<br>R: 5'- CGAGGCCGTAACGTTTTCCAGTGTGTAG -3'                     |
| P2               | F: 5'- TACCTCATAACATGATGCAATTACTCA -3'<br>R: 5'- CGAGGCCGTAACGTTTTCCAGTGTGTAG -3'                       |
| P3               | F: 5'- TACCATCTGATTGACATCTTTAAATGAG -3'<br>R: 5'- CGAGGCCGTAACGTTTTCCAGTGTGTAG -3'                      |
| P4               | F: 5'- TACCGAAAACGATCAGGTTCTGTAGTC -3'<br>R: 5'- CGAGGCCGTAACGTTTTCCAGTGTGTAG -3'                       |
| P5               | F: 5'- TACCAGGAAAGTTCTATCTATCAGATGG -3'<br>R: 5'- CGAGGCCGTAACGTTTTCCAGTGTGTAG -3'                      |
| P6               | F: 5'- TACCTGACCCACCTGATAACACCTAGT -3'<br>R: 5'- CGAGGCCGTAACGTTTTCCAGTGTGTAG -3'                       |
| Luciferase assay |                                                                                                         |
| P1               | F: 5'- CTTCGGGGTACCTGAGCATTGTTTGTTTTACATCTTTAAAT -3'<br>R: 5'- GTTGCCCTCGAGGCCGTAACGTTTTCCAGTGTGTAG -3' |
| P2               | F: 5'- CTTCGGGGTACCTCATAACATGATGCAATTACTCAGGA -3'<br>R: 5'- GTTGCCCTCGAGGCCGTAACGTTTTCCAGTGTGTAG -3'    |
| P3               | F: 5'- CTTCGGGGTACCATCTGATTGACATCTTTAAATGAGCAG -3'<br>R: 5'- GTTGCCCTCGAGGCCGTAACGTTTTCCAGTGTGTAG -3'   |
| P4               | F: 5'- CTTCGGGGTACCGAAAACGATCAGGTTCTGTAGTCA -3'<br>R: 5'- GTTGCCCTCGAGGCCGTAACGTTTTCCAGTGTGTAG -3'      |
| P5               | F: 5'- CTTCGGGGTACCAGGAAAGTTCTATCTATCAGATGGGG -3'                                                       |

P6 R: 5'- GTTGCCCTCGAGGCCGTAACGTTTTCCAGTGTGTAG -3'  
F: 5'- CTTCGGGGTACCTGACCCACCTGATAACACCTAGTT -3'  
R: 5'- GTTGCCCTCGAGGCCGTAACGTTTTCCAGTGTGTAG -3'  
F: 5'- CTTCGGGGTACCTGACTACTGGTGGCTGAGTTTAAAC -3'

P4\_1 R: 5'- GTTGCCCTCGAGCCCCATCTGATAGATAGAACTTTCCTA -3'  
F: 5'- CTTCGGGGTACCCAGTTTTGAAGAGATGTTGATAGCGAAT -3'

P4\_2 R: 5'- GTTGCCCTCGAGCCCCATCTGATAGATAGAACTTTCCTA -3'  
F: 5'- CTTCGGGGTACCCGAAATACAGTTTTCTCCTTGGCAAA -3'

P4\_3 R: 5'- GTTGCCCTCGAGCCCCATCTGATAGATAGAACTTTCCTA -3'  
F: 5'- CTTCGGGGTACCCCTACTCTCTGCTTTTGATGAAAATATTTTT -3'

P4\_4 R: 5'- GTTGCCCTCGAGCCCCATCTGATAGATAGAACTTTCCTA -3'

---

**Supplementary Table 2.** The primer sequences used for studies of the *NKX6.3* gene

| Primer name              | Sequences                                                                     |
|--------------------------|-------------------------------------------------------------------------------|
| <b>Mutation analysis</b> |                                                                               |
| E1-1                     | F: 5'- CGGTGTGCCAGTACTCTGTG -3'<br>R: 5'- CCTGGGGGCTGTAGTAGACC -3'            |
| E1-2                     | F: 5'- CTCGCAGGGGGTCTACTACA -3'<br>R: 5'- GGACCCGTACTCACTGTTGC -3'            |
| E2                       | F: 5'- AACCCACACTTCCTTCCTC -3'<br>R: 5'- TCTCCCGCACAGACTTACCT -3'             |
| E3-1                     | F: 5'- TGCCTTCCCAACAGAAAC -3'<br>R: 5'- CTCTTCTCCGCCACTTGGT -3'               |
| E3-2                     | F: 5'- TCTTTCTCATCGCAGGTGTG -3'<br>R: 5'- GATCTTCTCGTCCGAGT -3'               |
| E3-3                     | F: 5'- CGAGGACGACGAGTACAACA -3'<br>R: 5'- GAAGGGGAGGGGAAGGTA -3'              |
| <b>Methylation</b>       |                                                                               |
| NKX6.3 M                 | F: 5'- ATATTTATTGGGTATGATCGAGTCG -3'<br>R: 5'- GTTATATAACCACCTCTCTCCAACG -3'  |
| NKX6.3 U                 | F: 5'- TATTTATTGGGTATGATTGAGTTGT -3'<br>R: 5'- ATTATATAACCACCTCTCTCCACCAC -3' |
| <b>DNA copy number</b>   |                                                                               |
| NKX6.3                   | F: 5'- AACCCACACTTCCTTCCTC -3'<br>R: 5'- TCTCCCGCACAGACTTACCT -3'             |
| GAPDH                    | F: 5'-ACCCAGAAGACTGTGGATGG-3'<br>R: 5'-TTCTAGACGGCAGGTCAGGT-3'                |
| <b>Real time-RT-PCR</b>  |                                                                               |
| NKX6.3                   | F: 5'- TCTTTCTGCTTCTGGGGTGT -3'<br>R: 5'- GTCCAGCGGCTTGTTGTA CT -3'           |

GAPDH

F: 5'-AAATCAAGTGGGGCGATGCTG-3'

R: 5'-GCAGAGATGATGACCCTTTG-3'

---

**Supplementary Table 3.** The primer sequences used for studies of differentiation related gene expression

| Primer name | Sequences                             |
|-------------|---------------------------------------|
| Muc5ac      | F: 5'- GCTCAGCTGTTCTCTGGATGAG -3'     |
|             | R: 5'- TTA CTGGAAAGGCCCAAGCA -3'      |
| Muc2        | F: 5'- CTTCGACGGACTCTACTACAGC -3'     |
|             | R: 5'- CTTTGGTGTTGTTGCCAAAC -3'       |
| CDX2        | F: 5'- GCGGAACCTGTGCGAGTG -3'         |
|             | R: 5'- GACTGTAGTGAAACTCCTTCTCCAGC -3' |



**Supplementary Table 4.** The primer sequences used for predicted NKX6.3 target gene expression

| Primer name | Sequences                          |
|-------------|------------------------------------|
| BAK1        | F: 5'- AGAGCTGTCTGAACTCACGT -3'    |
|             | R: 5'- TTACTGTGCCAGAGCCAT -3'      |
| BBC3        | F: 5'- GACCTCAACGCACAGTA -3'       |
|             | R: 5'- CTAATTGGGCTCCATCT -3'       |
| BCL2        | F: 5'- GATTGTGGCCTTCTTTGAG -3'     |
|             | R: 5'- CAACTGAGCAGAGTCTTC -3'      |
| BCL3        | F: 5'- GAAAACAACAGCCTTAGCATGGT -3' |
|             | R: 5'- CTGCGGAGTACATTTGCG -3'      |
| BNIP3       | F: 5'- TGGACGGAGTAGCTCCAAGAGC -3'  |
|             | R: 5'- AGAAGCCCTGTTGGTATCTTGTG -3' |
| GKN1        | F: 5'- CAAAGTCGATGACCTGAGCA -3'    |
|             | R: 5'- CTTGCCTCTTGCATCTCCTC -3'    |
| MCL1        | F: 5'- AAAGCCTGTCTGCCAAAT -3'      |
|             | R: 5'- CCTATAAACCCACCACTC -3'      |
| MDM2        | F: 5'- CAGCAGGAATCATCGGACTCA -3'   |
|             | R: 5'- CCTTATTACACACAGAGCCAGGC -3' |
| PDCD4       | F: 5'- ATGGATATAGAAAATGAGCAGAC -3' |
|             | R: 5'- CCAGATCTGGACCGCCTATC -3'    |
| SIVA1       | F: 5'- TTCAGAACCACACGGCTAC -3'     |
|             | R: 5'- TTCCTCTCTTTTCCTCCC -3'      |
| TP53INP1    | F: 5'- CTCCTCCAACCAAGAACCA -3'     |
|             | R: 5'- GATGCCGGTAAACAGGAAAA -3'    |
| CCNB1       | F: 5'- GGCCAAAATGCCTATGAAGA -3'    |
|             | R: 5'- AGATGTTTCCATTGGGCTTG -3'    |

|        |                                                                               |
|--------|-------------------------------------------------------------------------------|
| CCND3  | F: 5' - CTGGCCATGAACTACCTGGA -3'<br>R: 5' - CCAGGAAATCATGTGCAATC -3'          |
| CCNE1  | F: 5' - CCACACCTGACAAAGAAGATGATGAC -3'<br>R: 5' - GAGCCTCTGGATGGTGCAATAAT -3' |
| CDKN1A | F: 5' - GGCAGACCAGCATGACAGATT -3'<br>R: 5' - GCGGATTAGGGCTTCCTCT -3'          |
| CDKN2B | F: 5' - CACCGTTGGCCGTAAACTTAAC -3'<br>R: 5' - TAATGAAGCTGAGCCCAGGTCT -3'      |
| CDKN2D | F: 5' - TCACACTGCTGTGGTCAGCTT -3'<br>R: 5' - CGTCCCTGCGATGGAGAT -3'           |
| CCKBR  | F: 5' - TCACACTGCTGTGGTCAGCTT -3'<br>R: 5' - CGTCCCTGCGATGGAGAT -3'           |
| CDH1   | F: 5' - GAACAGCACGTACACAGCCCT -3'<br>R: 5' - GCAGAACTGTCCCTGTCCCAG -3'        |
| GAST   | F: 5' - TCACACTGCTGTGGTCAGCTT -3'<br>R: 5' - CGTCCCTGCGATGGAGAT -3'           |
| LIPF   | F: 5' - CTCTAGCTCCTGTTGCCACT -3'<br>R: 5' - TACACATCCAAGCGACTCGT -3'          |
| SOX2   | F: 5' - TTGCTGCCTCTTTAAGACTAGGA -3'<br>R: 5' - CTGGGGCTCAAACCTTCTCTC -3'      |
| TWSG1  | F: 5' - TGAGCAAATGCCTCATTTCAG -3'<br>R: 5' - GGTTGCACATACCGACACAG -3'         |

---
